# Supplementary material for: Green synthesis of polypyrrole tubes using curcumin template for excellent electrochemical performance in supercapacitors
Source: Royal Society of Chemistry journal article supplement (doi:10.1039/c9ta11934e), 2020-01-01
Supplement: c9ta11934e1.pdf [file c9ta11934e1.pdf]

## Supporting Information

### **Green synthesis of polypyrrole tubes using curcumin template for excellent electrochemical performance in supercapacitors**

Jincy Parayangattil Jyothisasu<sup>a,b</sup> and Rong-Ho Lee<sup>\*a</sup>

<sup>a</sup>Department of Chemical Engineering, National Chung Hsing University, Taichung 402,  
Taiwan

<sup>b</sup>Department of Environmental Engineering, National Chung Hsing University, Taichung 402,  
Taiwan

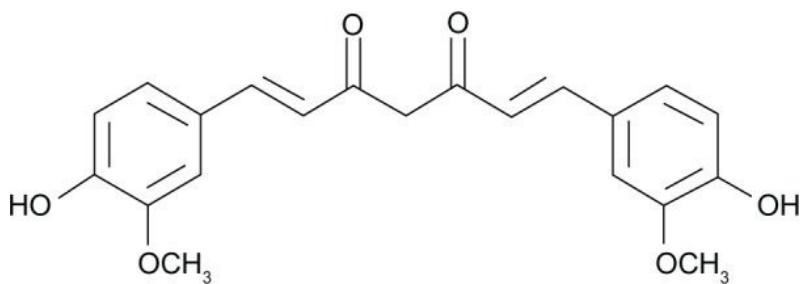

Fig. S1 Chemical structure of curcumin.

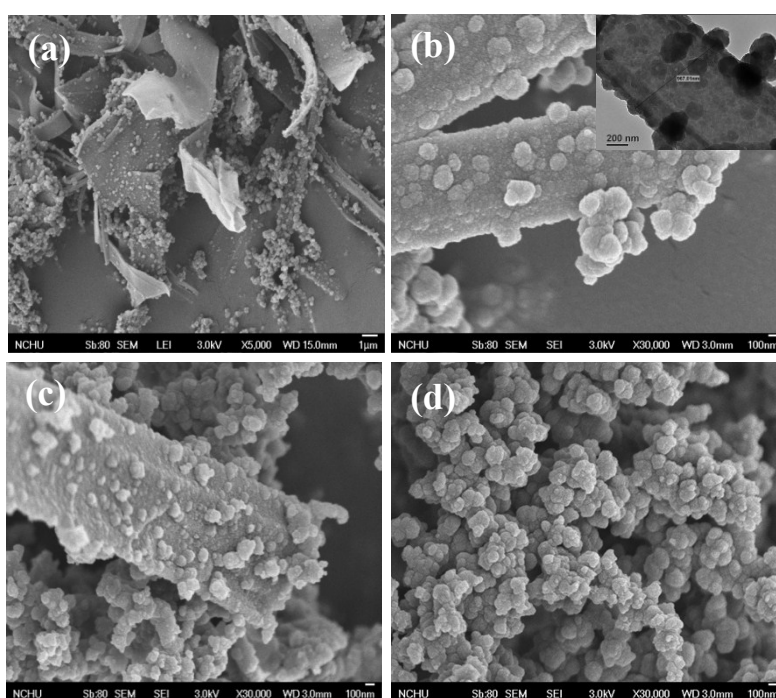

Fig. S2 (a) SEM image of PPyC1T1. (b, c) High-magnification SEM images of (b) PPyC1T2 and (c) PPyC1T4. (d) SEM image of PPy nanoparticles synthesized in the absence of the template. Inset to (b): TEM image of PPyC1T2.

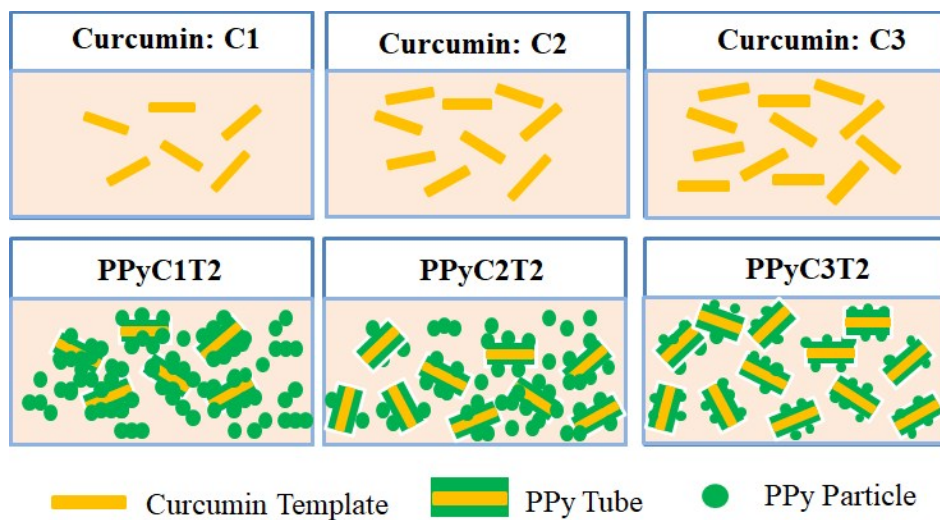

Fig. S3 Schematic representation of the mechanism of formation of tubular PPy (PPyT) at various concentrations of curcumin.

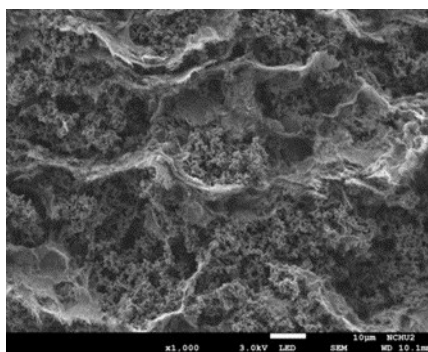

Fig. S4 SEM image of the PPy nanoparticle/*f*-CNT composite film.

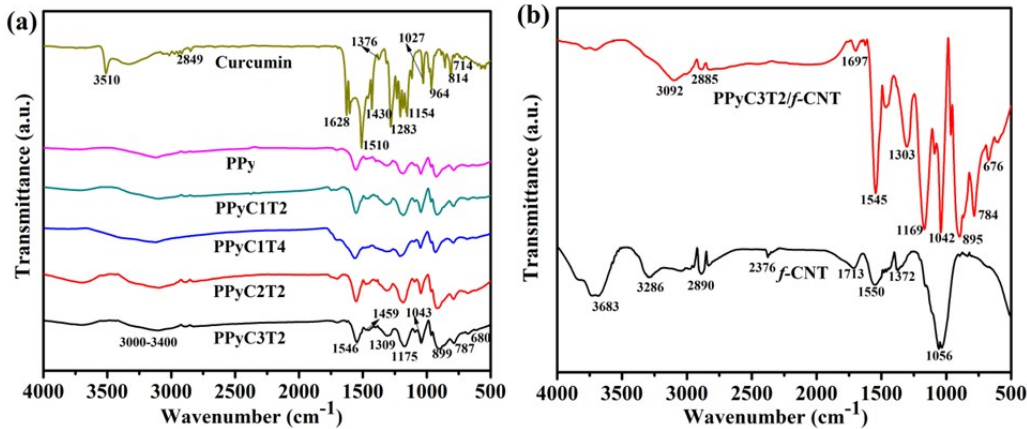

Fig. S5 FTIR spectra of (a) curcumin, PPy, PPyC1T2, PPyC1T4, PPyC2T2, and PPyC3T2 and (b) the *f*-CNTs and the PPyC3T2/*f*-CNT composite.

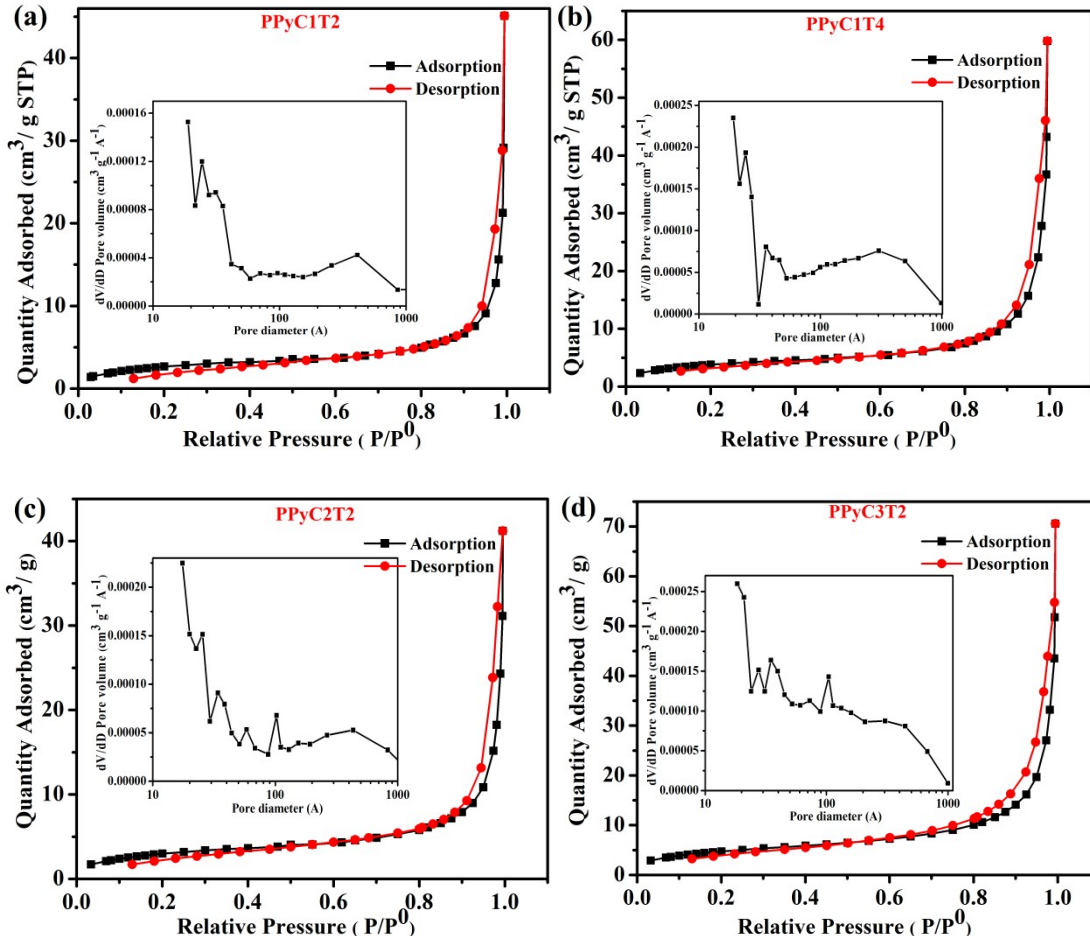

Fig. S6 Nitrogen adsorption/desorption isotherms of PPyC1T2, PPyC1T4, PPyC2T2, and PPyC3T2; insets: corresponding pore size distribution curves.

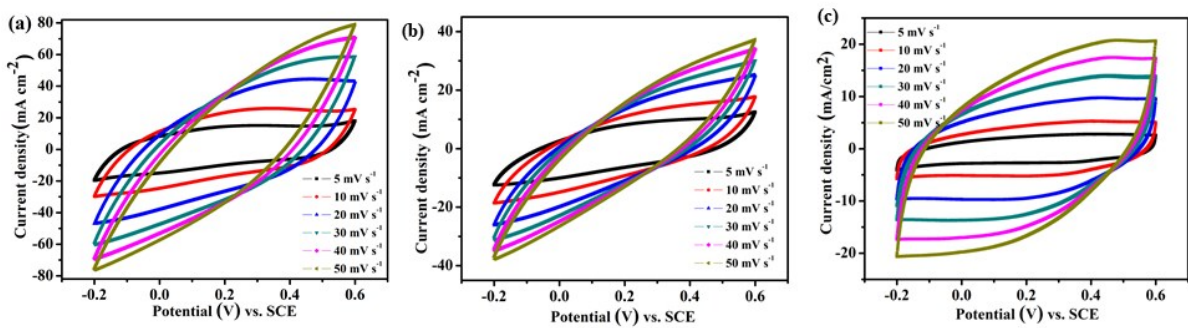

Fig. S7 CV curves, recorded at scan rates from 5 to 50  $\text{mV s}^{-1}$ , of (a) the PPyC1T2/*f*-CNT freestanding electrode, (b) the PPyC1T4/*f*-CNT freestanding electrode, and (c) the *f*-CNT freestanding electrode.

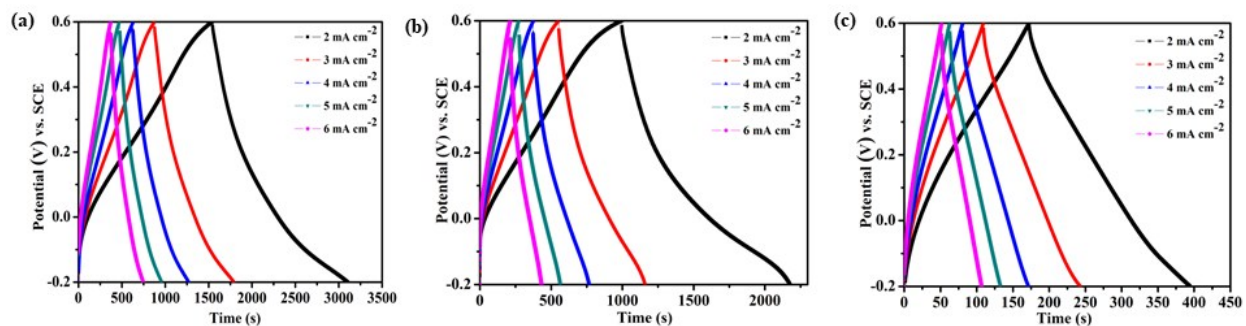

Fig. S8 GCD curves, recorded at current densities from 2 to 6  $\text{mA cm}^{-2}$ , of the (a) PPyC1T2/*f*-CNT, (b) PPyC1T4/*f*-CNT, and (c) *f*-CNT freestanding electrodes.

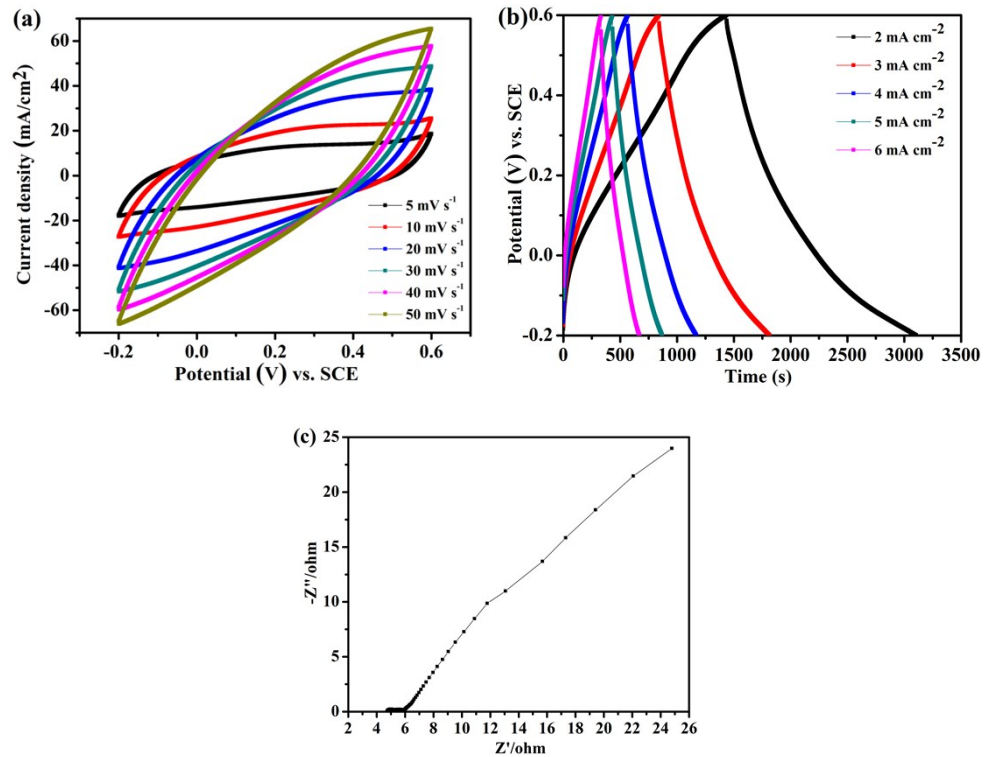

Fig. S9 Electrochemical performance of the PPy nanoparticle/*f*-CNT freestanding electrode in a three-electrode system. (a) CV curves recorded at a scan rate of 5 mV s<sup>-1</sup>. (b) GCD curves recorded at a current density of 2 mA cm<sup>-2</sup>. (c) Nyquist plots determined using EIS.

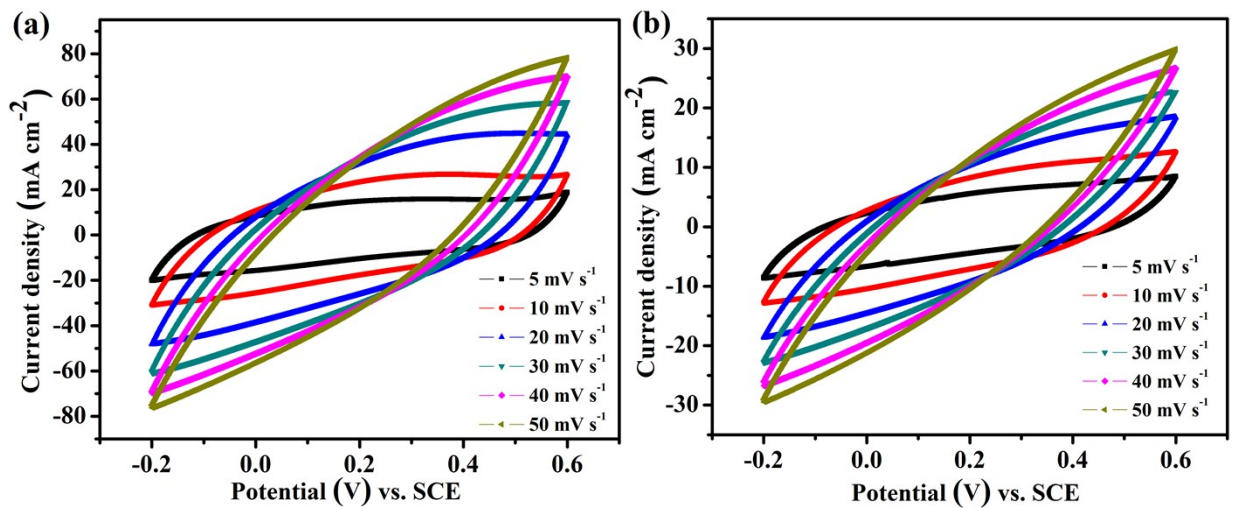

Fig. S10 CV curves, recorded at scan rates from 5 to 50  $\text{mV s}^{-1}$ , of the (a) PPyC2T2/*f*-CNT and (b) PPyC3T2 freestanding electrodes.

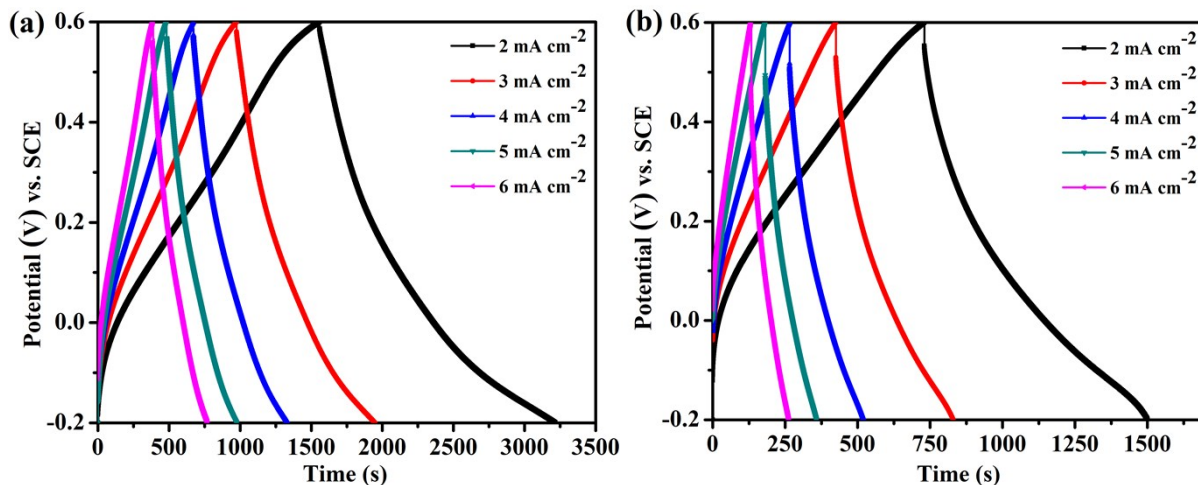

Fig. S11 GCD curves, recorded at current densities from 2 to 6  $\text{mA cm}^{-2}$ , of the (a) PPyC2T2/*f*-CNT and (b) PPyC3T2 freestanding electrodes.

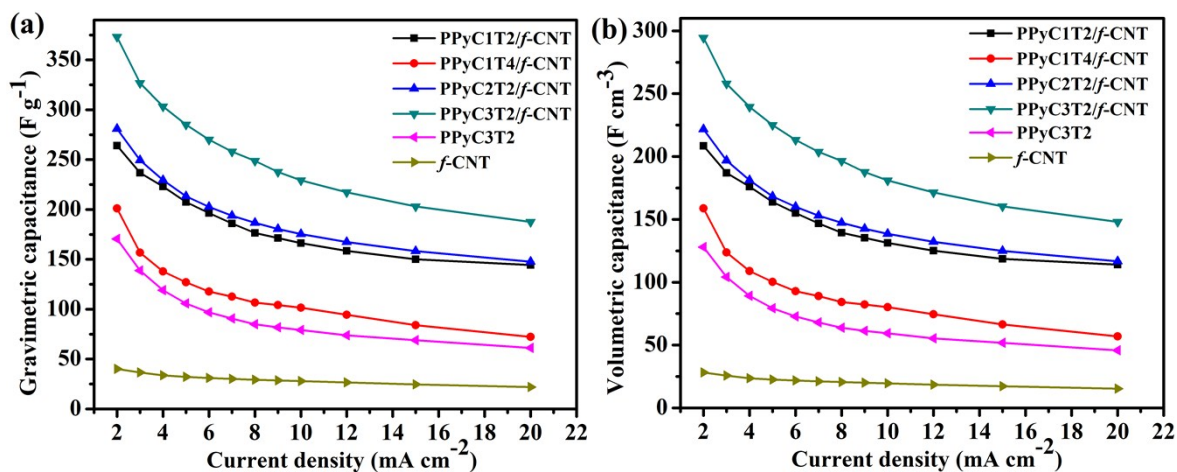

Fig. S12 (a) Gravimetric and (b) volumetric capacitances of the PPyC1T2/*f*-CNT, PPyC1T4/*f*-CNT, PPyC2T2/*f*-CNT, PPyC3T2/*f*-CNT, PPyC3T2, and *f*-CNT freestanding electrodes, plotted with respect to the current density.

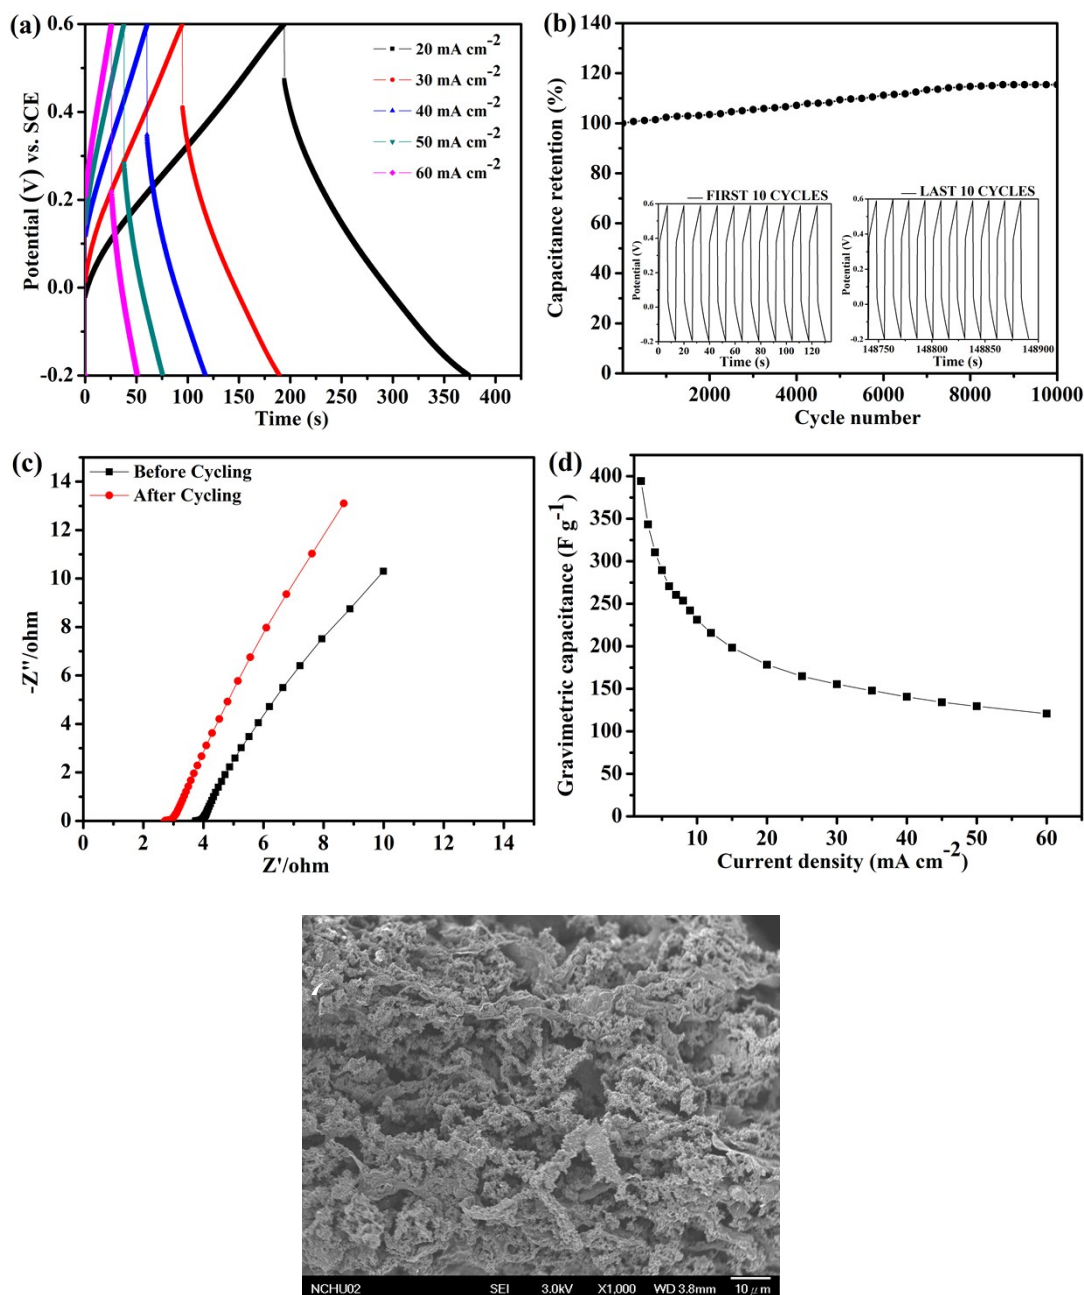

Fig. S13 Electrochemical performance of the PPyC3T2/*f*-CNT-thick freestanding electrode having a high mass loading of 30 mg cm<sup>-2</sup>, measured in a three-electrode system. (a) GCD curves recorded at current densities from 20 to 60 mA cm<sup>-2</sup>. (b) Cyclic performance recorded at a high current density of 90 mA cm<sup>-2</sup> for 10,000 charge/discharge cycles. (c) EIS spectra recorded before and after the cycling life test. (d) Gravimetric capacitances plotted with respect to the current density. (e) SEM image of PPyC3T2/*f*-CNT-thick freestanding electrode after cycling test.



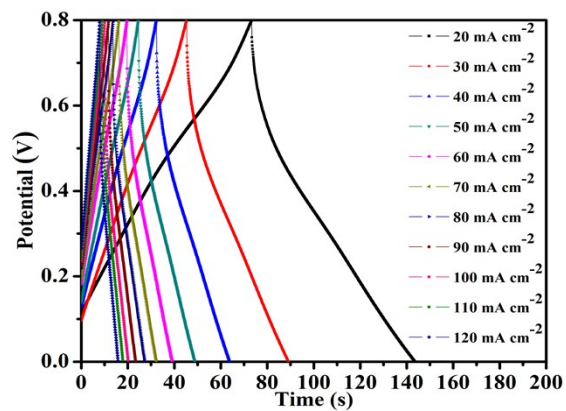

Fig. S14 GCD curves recorded at higher current densities, from 20 to 120 mA cm<sup>-2</sup>, for the symmetric supercapacitor incorporating PPyC3T2/*f*-CNT-thick freestanding electrodes.

**Table S1** Capacitive performances of conducting polymer-based composite electrodes reported previously in the literature and in this present paper

| Electrode materials                                          | Active material loading  | Current collector                                | Areal capacitance of electrode ( $C_A$ )                                                                                          | Reference                                                 |
|--------------------------------------------------------------|--------------------------|--------------------------------------------------|-----------------------------------------------------------------------------------------------------------------------------------|-----------------------------------------------------------|
| PPy tubes/ <i>f</i> -CNTs                                    | 30.0 mg cm <sup>-2</sup> | Freestanding electrode without current collector | 11,830.4 mF cm <sup>-2</sup> (295.8 F cm <sup>-3</sup> ) (394.4 F g <sup>-1</sup> ) at a current density of 2 mA cm <sup>-2</sup> | This study                                                |
| PPy-coated CNT paper                                         | 12.1 mg cm <sup>-2</sup> | Freestanding electrode                           | 8604.5 mF cm <sup>-2</sup> at a current density of 1 mA cm <sup>-2</sup>                                                          | <i>J. Mater. Chem. A</i> , 2019, <b>7</b> , 10751–10760   |
| Tiron-doped PPy/MWCNT composite electrode                    | 27 mg cm <sup>-2</sup>   | Ni foam                                          | 7.8 F cm <sup>-2</sup> at a scan rate of 0.5 mV s <sup>-1</sup>                                                                   | <i>J. Appl. Polym. Sci.</i> , 2015, <b>132</b> , 42376.   |
| PPy hydrogel                                                 | 20 mg cm <sup>-2</sup>   | Carbon cloth                                     | 6.4 F cm <sup>-2</sup> at a current density of 0.14 A g <sup>-1</sup>                                                             | <i>J. Mater. Chem. A</i> , 2014, <b>2</b> , 6086–6091     |
| Porous polyaniline/reduced graphene oxide composite material | 7.1 mg cm <sup>-2</sup>  | Freestanding electrode                           | 5830 mF cm <sup>-2</sup> at a current density of 15.72 mA cm <sup>-2</sup> (824 F g <sup>-1</sup> at 2.22 A g <sup>-1</sup> )     | <i>Energy Environ. Sci.</i> , 2018, <b>11</b> , 1280–1286 |
| Nanostructured PPy/MWCNT networks on cotton fabrics          | –                        | Freestanding electrode                           | 5.05 F cm <sup>-2</sup> at a scan rate of 1 mV s <sup>-1</sup>                                                                    | <i>Cellulose</i> , 2019, <b>26</b> , 4071–4084.           |
| PPy-coated CNTs                                              | 18 mg cm <sup>-2</sup>   | Ni foam                                          | 4.798 F cm <sup>-2</sup> at a scan rate of 2 mV s <sup>-1</sup>                                                                   | <i>J. Mater. Chem. A</i> , 2014, <b>2</b> , 14666–14673   |
| PPy-coated air-laid paper                                    | –                        | Freestanding electrode                           | 3100 mF cm <sup>-2</sup> at a current density of 1                                                                                | <i>Adv. Energy Mater.</i> , 2017, <b>7</b> ,              |

|                                                                                                                             |                          |                        |                                                                                                                               |                                                                                                                                        |
|-----------------------------------------------------------------------------------------------------------------------------|--------------------------|------------------------|-------------------------------------------------------------------------------------------------------------------------------|----------------------------------------------------------------------------------------------------------------------------------------|
|                                                                                                                             |                          |                        | mA cm <sup>-2</sup>                                                                                                           | 1701247                                                                                                                                |
| PPy nanofiber–MWCNT electrodes                                                                                              | 30 mg cm <sup>-2</sup>   | Ni foam                | 4.62 F cm <sup>-2</sup> at a scan rate of 2 mV s <sup>-1</sup>                                                                | <i>J. Mater. Chem. A</i> , 2013, <b>1</b> , 11614–11622                                                                                |
| PPy-coated knitted fabric                                                                                                   | 12.3 mg cm <sup>-2</sup> | Freestanding electrode | 4117 mF cm <sup>-2</sup> at a current density of 2 mA cm <sup>-2</sup>                                                        | <i>J. Mater. Chem. A</i> , 2016, <b>4</b> , 12981–12986                                                                                |
| Cellulose nanofiber/cellulose-derived carbon sheet/polyaniline nanocomposite film                                           | –                        | Freestanding electrode | 3297.2 mF cm <sup>-2</sup> (220 F g <sup>-1</sup> ) at a current density of 1 mA cm <sup>-2</sup>                             | <i>J. Mater. Chem. A</i> , 2016, <b>4</b> , 13352–13362                                                                                |
| Polypyrrole/nylon membrane composite film                                                                                   | 5 mg cm <sup>-2</sup>    | Freestanding electrode | 2911.4 mF cm <sup>-2</sup> at a current density of 1 mA cm <sup>-2</sup>                                                      | <i>J. Materiomics</i> , 2019, DOI: <a href="https://doi.org/10.1016/j.jmat.2019.1.004">https://doi.org/10.1016/j.jmat.2019.1.004</a> . |
| Microfibrillated cellulose fiber (MCF) framework/chitosan-derived N-self-doped carbon sheet (N-CS)/PANI composite electrode | –                        | Freestanding electrode | 1688.8 mF cm <sup>-2</sup> (139.6 F g <sup>-1</sup> , 84.4 F cm <sup>-3</sup> ) at a current density of 1 mA cm <sup>-2</sup> | <i>J. Mater. Chem. A</i> , 2018, <b>6</b> , 20338–20346                                                                                |
| PANI/CNT/air-laid paper composite electrode                                                                                 | 3.32 mg cm <sup>-2</sup> | Freestanding electrode | 1506 mF cm <sup>-2</sup> at a current density of 10 mA cm <sup>-2</sup>                                                       | <i>J. Mater. Chem. A</i> , 2017, <b>5</b> , 19934–19942                                                                                |
| PPy-coated cotton fabrics                                                                                                   | 5.7 mg cm <sup>-2</sup>  | Freestanding electrode | 1325 mF cm <sup>-2</sup> at 2 mA cm <sup>-2</sup>                                                                             | <i>RSC Adv.</i> , 2017, <b>7</b> , 48934–48941                                                                                         |
| PPy/paper composite electrode                                                                                               | 3.54 mg cm <sup>-2</sup> | Freestanding electrode | 1.5 F cm <sup>-2</sup> at 1 mA cm <sup>-2</sup>                                                                               | <i>Energy Environ. Sci.</i> , 2013, <b>6</b> , 470–476                                                                                 |
| Polypyrrole on vertically aligned carbon nanotube arrays/carbon fiber paper                                                 | 0.84 mg cm <sup>-2</sup> | Carbon fiber paper     | 0.78 F cm <sup>-2</sup> at 2 mV s <sup>-1</sup>                                                                               | <i>J. Mater. Chem. A</i> , 2015, <b>3</b> , 22043–22052                                                                                |

|                                                                          |                          |                        |                                                                         |                                                                         |
|--------------------------------------------------------------------------|--------------------------|------------------------|-------------------------------------------------------------------------|-------------------------------------------------------------------------|
| (PPy/VA-CNTs/CFP)                                                        |                          |                        |                                                                         |                                                                         |
| Polyaniline/carbon nanotubes/graphene/polyester textile electrode        | –                        | Freestanding electrode | 791 mF cm <sup>-2</sup> at a current density of 1.5 mA cm <sup>-2</sup> | <i>Electrochim. Acta</i> , 2017, <b>249</b> , 387–394                   |
| Carbon nanotube/polyaniline hydrogel film                                | –                        | Freestanding electrode | 680 mF cm <sup>-2</sup> at 1 mA cm <sup>-2</sup>                        | <i>J. Mater. Chem. A</i> , 2015, <b>3</b> , 23864–23870                 |
| PEDOT nanowire film                                                      | –                        | Freestanding electrode | 667.5 mF cm <sup>-2</sup> at 1 mA cm <sup>-2</sup>                      | <i>J. Mater. Chem. A</i> , 2019, <b>7</b> , 1323–1333                   |
| rGO/PPy NT paper                                                         | 2.46 mg cm <sup>-2</sup> | Carbon paper           | 807 mF cm <sup>-2</sup> at 1 mA cm <sup>-2</sup>                        | <i>J. Power Sources</i> , 2016, <b>302</b> , 39–45                      |
| Graphene/activated carbon/polypyrrole (GN/AC/PPy)                        | 2.75 mg cm <sup>-2</sup> | Freestanding electrode | 906 mF cm <sup>-2</sup> at a current density of 0.5 mA cm <sup>-2</sup> | <i>RSC Adv.</i> , 2017, <b>7</b> , 31342–31351                          |
| Free-standing reduced graphene oxide/polypyrrole/cellulose hybrid papers | –                        | Freestanding electrode | 1.20 F cm <sup>-2</sup> at 2 mA cm <sup>-2</sup>                        | <i>J. Mater. Chem. A</i> , 2017, <b>5</b> , 3819–3831                   |
| CuO NWAs@PEDOT:PSS composite electrode                                   | –                        | Cu foam                | 907.5 mF cm <sup>-2</sup> at 3 mA cm <sup>-2</sup>                      | <i>J. Mater. Sci.: Mater. Electron.</i> , 2019, <b>30</b> , 10953–10960 |
| PEDOT/CC hybrid electrode                                                | –                        | Carbon cloth           | 201.4 mF cm <sup>-2</sup> at 1 mA cm <sup>-2</sup>                      | <i>Nanotechnology</i> , 2016, <b>27</b> , 385705                        |
| rGO-PEDOT/PSS film                                                       | 8.49 mg cm <sup>-2</sup> | Freestanding electrode | 448 mF cm <sup>-2</sup> at a scan rate of 10 mV s <sup>-1</sup>         | <i>Sci. Rep.</i> , 2015, <b>5</b> , 17045                               |
